# Supplementary material
Source: PubMed Central journal article supplement (PMC7007765)
Supplement: NIHMS1063866-supplement-Supplementary_Appendix.pdf [file NIHMS1063866-supplement-Supplementary_Appendix.pdf]

Supplemental Table 2. <sup>18</sup>F-Fluciclovine PET/CT interpretation guide.

|                                         | Consider suspicious for cancer                                                                                                                                                                                                                                                                                                                                                                                                              | Exceptions                                                                                                                                                                                                                   |
|-----------------------------------------|---------------------------------------------------------------------------------------------------------------------------------------------------------------------------------------------------------------------------------------------------------------------------------------------------------------------------------------------------------------------------------------------------------------------------------------------|------------------------------------------------------------------------------------------------------------------------------------------------------------------------------------------------------------------------------|
| <b>Prostate bed (prostatectomy)</b>     | Focal uptake, visually $\geq$ that in bone marrow, in a site typical for prostate cancer recurrence                                                                                                                                                                                                                                                                                                                                         | If the focus of uptake is small (< 1cm), it may be considered suspicious if the uptake is visually greater than blood pool activity                                                                                          |
| <b>Prostate bed (non-prostatectomy)</b> | Moderate asymmetric focal uptake, visually $\geq$ bone marrow uptake                                                                                                                                                                                                                                                                                                                                                                        | If the focus of uptake is small (< 1cm) and in a site typical for recurrence), it may be considered suspicious if the lesion is visually greater than blood pool activity                                                    |
| <b>Lymph nodes</b>                      | <ul style="list-style-type: none"> <li>• Nodal uptake visually <math>\geq</math> than bone marrow uptake in a site typical of recurrence</li> <li>• Mild, symmetric nodal uptake in sites <i>atypical for recurrence (inguinal, distal external iliac, hilar, and axillary nodes)</i> is typically considered physiologic unless within the context of other clear malignant disease when it <i>is</i> suspicious for recurrence</li> </ul> | <ul style="list-style-type: none"> <li>• If the uptake is in a small node (&lt; 1cm) and in a site typical for recurrence, it is considered suggestive if the uptake is visually greater than blood pool activity</li> </ul> |
| <b>Bone</b>                             | Focal uptake clearly visualized on maximum-intensity-projection or PET-only images                                                                                                                                                                                                                                                                                                                                                          | A bone abnormality visualized on CT (e.g., dense sclerosis without uptake) does not exclude the presence of metastasis                                                                                                       |
