# Supplementary material
Source: PubMed Central journal article supplement (PMC7007765)
Supplement: NIHMS1063866-supplement-Supplementary_Figure_1.pdf [file NIHMS1063866-supplement-Supplementary_Figure_1.pdf]

|                        |                                  |  |
|------------------------|----------------------------------|--|
| Study BED003<br>LOCATE | Site no. <input type="text"/>    |  |
|                        | Subject no. <input type="text"/> |  |

**Visit 1 - Screening**

**INTENDED MANAGEMENT PLAN**

Does the patient have a current intended management plan?  No  Yes

Date

Is it intended to give ADT?  No  Yes

Duration  months

Type

Frequency

What is the current intended management plan? **Check no more than one option.**  
**Note: ADT use is indicated above.**

Salvage radiotherapy to the prostate bed

Salvage radiotherapy to the prostate bed, with boost to areas guided by conventional imaging

Salvage radiotherapy to the prostate bed and whole pelvis

Salvage radiotherapy to the prostate bed and whole pelvis, with boost to areas guided by conventional imaging

Salvage cryotherapy

Salvage brachytherapy

Salvage HIFU

Salvage prostatectomy

Salvage prostatectomy and limited lymph node dissection

Salvage prostatectomy and extended lymph node dissection (including internal and external iliac, and obturator nodes)

Other, please specify

|                        |                                  |  |
|------------------------|----------------------------------|--|
| Study BED003<br>LOCATE | Site no. <input type="text"/>    |  |
|                        | Subject no. <input type="text"/> |  |

**Visit 3**

**REVISED MANAGEMENT PLAN**

Was the management plan revised after Fluciclovine scan results available?  No  Yes Date

Is the change in management plan due to  Prostate Cancer  Incidental findings, please specify

**Check all that apply**  
What is the revised management plan?

|                                                                                                                                                                                                                                               |                             |                          |                      |
|-----------------------------------------------------------------------------------------------------------------------------------------------------------------------------------------------------------------------------------------------|-----------------------------|--------------------------|----------------------|
| <input type="checkbox"/> Active surveillance                                                                                                                                                                                                  | <b>Duration</b>             | <b>Type</b>              | <b>Frequency</b>     |
| <input type="checkbox"/> Androgen deprivation therapy                                                                                                                                                                                         | <input type="text"/> months | <input type="text"/>     | <input type="text"/> |
| <input type="checkbox"/> Chemotherapy                                                                                                                                                                                                         | <b>Duration</b>             | <b>Chemotherapy name</b> |                      |
| <input type="checkbox"/> Salvage radiotherapy to the prostate bed                                                                                                                                                                             | <input type="text"/>        | <input type="text"/>     |                      |
| <input type="checkbox"/> Salvage radiotherapy to the prostate bed, with boost to areas guided by conventional imaging                                                                                                                         |                             |                          |                      |
| <input type="checkbox"/> Salvage radiotherapy to the prostate bed with boost to areas guided by fluciclovine (18F) PET/CT                                                                                                                     |                             |                          |                      |
| <input type="checkbox"/> Salvage radiotherapy to the prostate bed and whole pelvis                                                                                                                                                            |                             |                          |                      |
| <input type="checkbox"/> Salvage radiotherapy to the prostate bed and whole pelvis, with boost to areas guided by conventional imaging                                                                                                        |                             |                          |                      |
| <input type="checkbox"/> Salvage radiotherapy to the prostate bed and whole pelvis with boost to areas guided by fluciclovine (18F) PET/CT                                                                                                    |                             |                          |                      |
| <input type="checkbox"/> Salvage cryotherapy                                                                                                                                                                                                  |                             |                          |                      |
| <input type="checkbox"/> Salvage cryotherapy with treatment plan guided by fluciclovine (18F) PET/CT                                                                                                                                          |                             |                          |                      |
| <input type="checkbox"/> Salvage brachytherapy                                                                                                                                                                                                |                             |                          |                      |
| <input type="checkbox"/> Salvage brachytherapy with treatment plan guided by fluciclovine (18F) PET/CT                                                                                                                                        |                             |                          |                      |
| <input type="checkbox"/> Salvage HIFU                                                                                                                                                                                                         |                             |                          |                      |
| <input type="checkbox"/> Salvage HIFU with treatment plan guided by fluciclovine (18F) PET/CT                                                                                                                                                 |                             |                          |                      |
| <input type="checkbox"/> Salvage prostatectomy                                                                                                                                                                                                |                             |                          |                      |
| <input type="checkbox"/> Salvage prostatectomy with targeted resection / sampling of fluciclovine (18F) positive areas outside conventional surgical field                                                                                    |                             |                          |                      |
| <input type="checkbox"/> Salvage prostatectomy and limited lymph node dissection                                                                                                                                                              |                             |                          |                      |
| <input type="checkbox"/> Salvage prostatectomy and limited lymph node dissection with targeted resection / sampling of fluciclovine (18F) positive areas outside surgical field                                                               |                             |                          |                      |
| <input type="checkbox"/> Salvage prostatectomy and extended lymph node dissection (including internal and external iliac, and obturator nodes)                                                                                                |                             |                          |                      |
| <input type="checkbox"/> Salvage prostatectomy and extended lymph node dissection (including internal and external iliac, and obturator nodes) with targeted resection / sampling of fluciclovine (18F) positive areas outside surgical field |                             |                          |                      |
| <input type="checkbox"/> Targeted salvage treatment of fluciclovine (18F) positive extra-pelvic / bony areas                                                                                                                                  |                             |                          |                      |
| <input type="checkbox"/> Other, please specify                                                                                                                                                                                                | <input type="text"/>        |                          |                      |
