# Supplementary material
Source: PubMed Central journal article supplement (PMC7007765)
Supplement: NIHMS1063866-supplement-Supplementary_Figure_2.pdf [file NIHMS1063866-supplement-Supplementary_Figure_2.pdf]

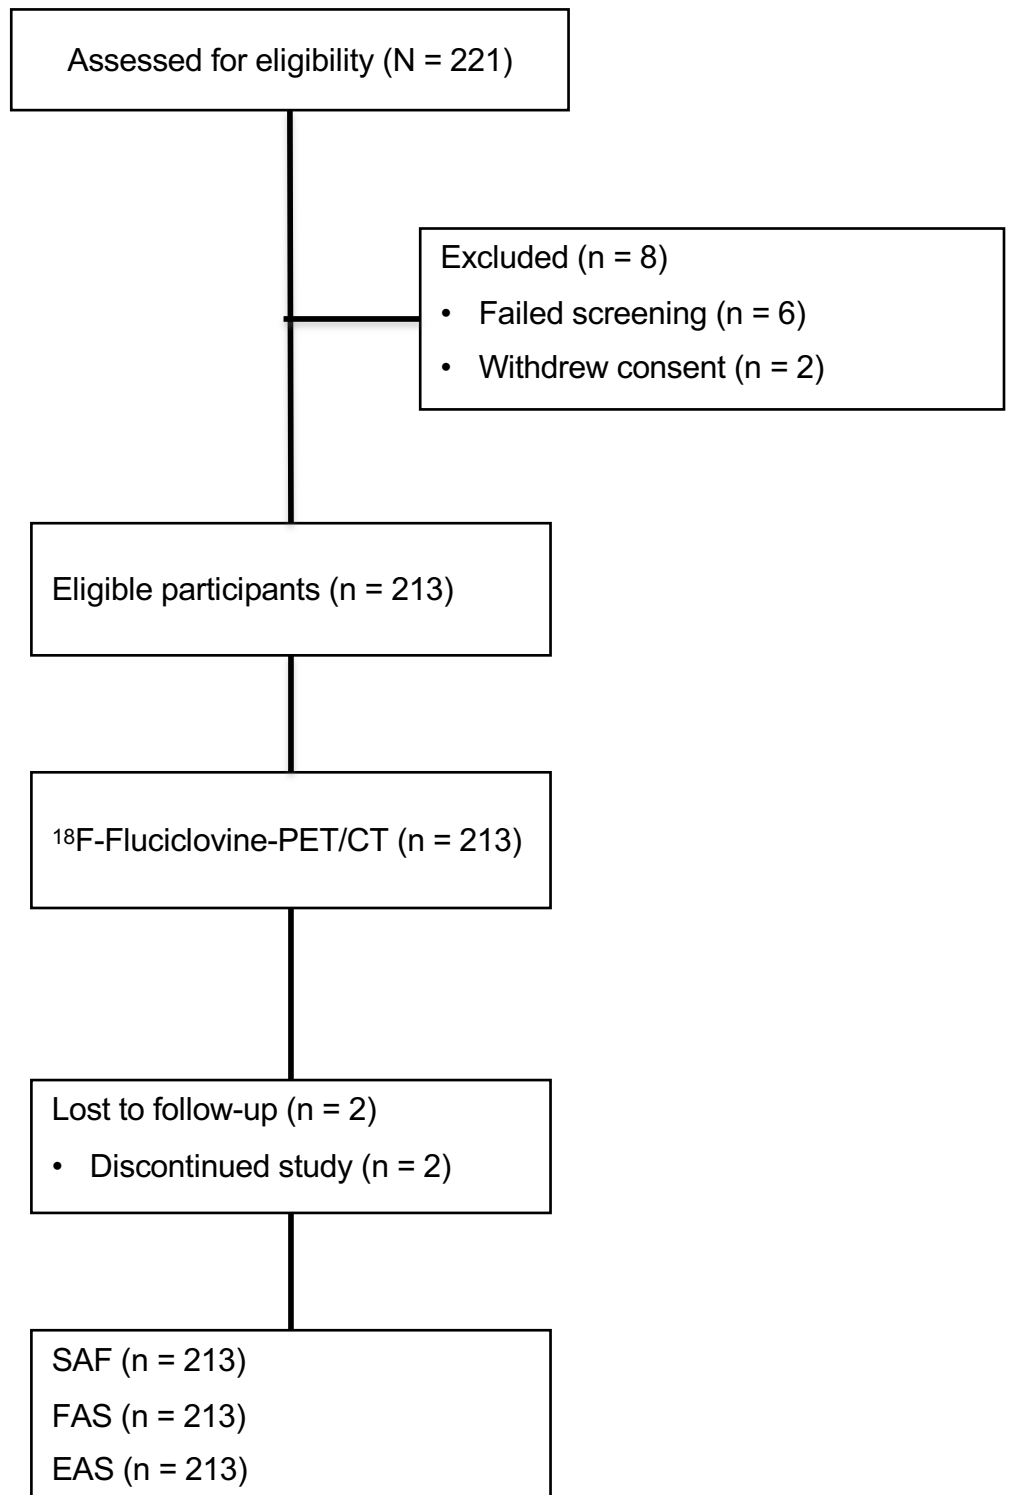

SAF, safety analysis set, all subjects included in the database and who had <sup>18</sup>F-fluciclovine administered. FAS, full analysis set, all subjects enrolled who had <sup>18</sup>F-fluciclovine-PET/CT at baseline. EAS, evaluable analysis set, all subjects from the FAS who have an intended treatment management plan completed and a revised management plan page completed.
