# Supplementary material
Source: PubMed Central journal article supplement (PMC7007765)
Supplement: NIHMS1063866-supplement-Supplementary_Table.pdf [file NIHMS1063866-supplement-Supplementary_Table.pdf]

**Supplementary Table. Participating institutions and investigators.**

| <b>Institution</b>                                                             | <b>Lead Nuclear Medicine / Radiology Investigator</b> | <b>Lead Radiation / Medical Oncology Investigator</b> | <b>Lead Urology Investigator</b> |
|--------------------------------------------------------------------------------|-------------------------------------------------------|-------------------------------------------------------|----------------------------------|
| Thomas Jefferson University                                                    | Charles Intenzo, MD                                   | Jean Hoffman-Censits, MD<br>William Kevin Kelly, MD   |                                  |
| Fox Chase Cancer Center                                                        | Jian Q. (Michael) Yu, MD                              | Eric Horwitz, MD                                      | Elizabeth Plimack, MD            |
| Washington University St. Louis                                                | Barry A. Siegel, MD                                   | Jeff M. Michalski, MD                                 | Gerald L. Andriole, MD           |
| University of Florida, College of Medicine - Jacksonville                      | Barry M. McCook, MD<br>Martha Wasserman, MD           | Romaine C. Nichols MD                                 | Christopher R. Williams MD       |
| Genesis Research                                                               | Michael Kipper, MD                                    |                                                       | Paul Dato, MD                    |
| Huntsman Cancer Institute                                                      | John M. Hoffman, MD                                   | Jonathan Tward, MD                                    |                                  |
| Loyola University Medical Center                                               | Bitat Savir-Baruch, MD                                | Abhishek Solanki, MD                                  | Gopal Gupta, MD                  |
| City of Hope Cancer Center                                                     | Dave Yamauchi, MD                                     | Przemyslaw Twardowski, MD<br>Cy Stein, MD             |                                  |
| Tower Urology / Liberty Pacific Imaging                                        | Judith Rose, MD                                       |                                                       | David Josephson, MD              |
| University of Louisville Hospital                                              | Shaile Philips, M.D<br>Harry M. Rice, MD              |                                                       | Jamie C. Messer, MD              |
| Icahn School of Medicine at Mount Sinai                                        | Lale Kostakoglu, MD                                   | William Oh, MD                                        | Ashutosh Tewari, MD              |
| Manhattan Medical Research Practice / Lenox Hill Radiology                     | John Melnick MD                                       |                                                       | Jed Kaminetsky, MD               |
| Coastal Urology / Personal Care Molecular Imaging                              | Borys Krynycky, MD                                    |                                                       | Daniel Burzon, MD                |
| Urologic Consultants of SE Pennsylvania / Adler Institute for Advanced Imaging | Lee P. Adler, MD                                      |                                                       | Laurence H. Belkoff, DO          |
| Hospital of the University of Pennsylvania                                     | Michael Farwell, MD                                   | Neha Vapiwala, MD                                     |                                  |
